# Supplementary material for: EZH2 inhibition suppresses endometrial cancer progression via miR-361/Twist axis
Source: PubMed Central journal article supplement (PMC5355116; doi:10.18632/oncotarget.14586), 2017-01-10
Supplement: oncotarget-08-13509-s001.pdf [file oncotarget-08-13509-s001.pdf]

## **EZH2 inhibition suppresses endometrial cancer progression via miR-361/Twist axis**

### **Supplementary Materials**

#### **REFERENCES**

1. Chen Y, Jacamo R, Konopleva M, Garzon R, Croce C, Andreeff M. CXCR4 downregulation of let-7a drives chemoresistance in acute myeloid leukemia. *J Clin Invest.* 2013; 123:2395–2407.
2. Yamagishi M, Nakano K, Miyake A, Yamochi T, Kagami Y, Tsutsumi A, Matsuda Y, Sato-Otsubo A, Muto S, Utsunomiya A, Yamaguchi K, Uchimaru K, Ogawa S, et al. Polycomb-mediated loss of miR-31 activates NIK-dependent NF- $\kappa$ B pathway in adult T cell leukemia and other cancers. *Cancer Cell.* 2012; 21:121–135.

**Supplementary Table 1: Top 19 up-regulated and 15 down-regulated miRNAs by miR-101 mimic in human endometrial cancer SPAC-1-L cell, measured with microarray analysis**

**Up-regulated miRNAs**

| No. | miRNA name     | Fold change (miR-101/control mimic) |
|-----|----------------|-------------------------------------|
| 1   | hsa-miR-101    | 409.400                             |
| 2   | hsa-miR-371-5p | 137.989                             |
| 3   | hsa-miR-429    | 129.773                             |
| 4   | hsa-miR-2276   | 123.795                             |
| 5   | hsa-miR-3935   | 120.434                             |
| 6   | hsa-miR-671-5p | 118.236                             |
| 7   | hsa-miR-432    | 83.472                              |
| 8   | hsa-miR-424*   | 82.711                              |
| 9   | hsa-miR-622    | 79.592                              |
| 10  | hsa-miR-3654   | 64.650                              |
| 11  | hsa-miR-1972   | 59.724                              |
| 12  | hsa-miR-3610   | 58.056                              |
| 13  | hsa-miR-3156   | 56.923                              |
| 14  | hsa-miR-3125   | 56.555                              |
| 15  | hsa-miR-874    | 54.443                              |
| 16  | hsa-miR-296-5p | 54.369                              |
| 17  | hsa-miR-665    | 36.375                              |
| 18  | hsa-miR-345    | 32.633                              |
| 19  | hsa-miR-1273e  | 30.746                              |

**Down-regulated miRNAs**

| No. | miRNA name     | Fold change (miR-101/control mimic) |
|-----|----------------|-------------------------------------|
| 1   | hsa-miR-212    | 0.008                               |
| 2   | hsa-miR-7      | 0.013                               |
| 3   | hsa-miR-424    | 0.013                               |
| 4   | hsa-let-7d     | 0.015                               |
| 5   | hsa-miR-31*    | 0.016                               |
| 6   | hsa-miR-455-3p | 0.017                               |
| 7   | hsa-miR-96     | 0.017                               |
| 8   | hsa-miR-125b   | 0.018                               |
| 9   | hsa-miR-301a   | 0.018                               |
| 10  | hsa-miR-18a    | 0.019                               |
| 11  | hsa-miR-571    | 0.019                               |
| 12  | hsa-let-7g     | 0.327                               |
| 13  | hsa-miR-30b    | 0.329                               |
| 14  | hsa-miR-30c    | 0.400                               |
| 15  | hsa-miR-331-3p | 0.413                               |

**Supplementary Table 2: Primers used for making Twist 3'-UTR-mutation luciferase constructs, pGL-3-miR-361 promoter luciferase reporter constructs and miR-361 promoter mutations (site 2, 5 and 8), or for ChIP-qPCR analysis**

|                    |                                           |                                          |
|--------------------|-------------------------------------------|------------------------------------------|
| Twist 3'-UTR-mut F | CCTCACACCTCTGCATTTCGACTAGAAAGTCTGAACAGTTG | 3'-UTR mutagenesis                       |
| Twist 3'-UTR-mut R | CAACTGTTTCAGACTTCTAGTCGAATGCAGAGGTGTGAGG  | 3'-UTR mutagenesis                       |
| pGL-3-miR-361-2 F  | CGCACGCGTCCCTCTGAAGTAGCGACCAG             | Promoter luciferase reporter             |
| pGL-3-miR-361-2 R  | CCGAGATCTGCTGCAAAGCAACCTCTTTC             | Promoter luciferase reporter             |
| pGL-3-miR-361-M2 F | CTGGCTCCCCGAAACCCGGGCTTTCTAGCCACAG        | mutagenesis                              |
| pGL-3-miR-361-M2 R | CTGTGGGCTAGAAAGCCCGGGTTTCGGGAGCCAG        | mutagenesis                              |
| pGL-3-miR-361-5 F  | CGCACGCGTCCACGTTTTCTTGTTCAG               | Promoter luciferase reporter             |
| pGL-3-miR-361-5 R  | CCGAGATCTACCATAAAAAACACATGTCCCAGT         | Promoter luciferase reporter             |
| pGL-3-miR-361-M5 F | ATTGGGGTTGATTCCCAGCTTTGCTATTGTAAA         | mutagenesis                              |
| pGL-3-miR-361-M5 R | TTTACAATAGCAAAGCGCGGGAATCAACCCAAAT        | mutagenesis                              |
| pGL-3-miR-361-8 F  | CGCACGCGTAAGCAGCTTGCTCAAAATTATA           | Promoter luciferase reporter             |
| pGL-3-miR-361-8 R  | CGAGATCTTGTCACATTTTGGGCATAGT              | Promoter luciferase reporter             |
| pGL-3-miR-361-M8 F | GAAAAGGAATCTCCCCGGAATGAACTTATTCAG         | mutagenesis                              |
| pGL-3-miR-361-M8 R | CTGAATAAGTTCATTCCCAGGGAGATTCCTTTTC        | mutagenesis                              |
| miR-361-YY1-1 F    | ATTCTGGGGCCTGGAGTATT                      | ChIP-qPCR                                |
| miR-361-YY1-1 R    | CCCATGCAGAGTCCCTACTG                      | ChIP-qPCR                                |
| miR-361-YY1-2 F    | GGATATGGGGAGCATGTTGT                      | ChIP-qPCR                                |
| miR-361-YY1-2 R    | CAGGTCCTGTGGGCTAGAAA                      | ChIP-qPCR                                |
| miR-361-YY1-3 F    | AAGAGGTTGCTTTGCAGCTC                      | ChIP-qPCR                                |
| miR-361-YY1-3 R    | CTGGCCGTGTGGTAGAAAAG                      | ChIP-qPCR                                |
| miR-361-YY1-4 F    | TGTCAGCATTTTGATCAGAGC                     | ChIP-qPCR                                |
| miR-361-YY1-4 R    | CAGAAGAAGATAGTAAGATGAGGGAAA               | ChIP-qPCR                                |
| miR-361-YY1-5 F    | TTGATGAGCATTTGGGTTGA                      | ChIP-qPCR                                |
| miR-361-YY1-5 R    | CATGTCCCAGTATGTTCACTGC                    | ChIP-qPCR                                |
| miR-361-YY1-6 F    | TGGTAGAATGATTTGTATTCCCTTTG                | ChIP-qPCR                                |
| miR-361-YY1-6 R    | CAGAACTACCATATGACCTAGCAA                  | ChIP-qPCR                                |
| miR-361-YY1-7 F    | AGAGAAGGCCAAAAGTTACAA                     | ChIP-qPCR                                |
| miR-361-YY1-7 R    | TCCCTCCATGTTGCTCTAT                       | ChIP-qPCR                                |
| miR-361-YY1-8 F    | CAACATGGAGGGAATGGAAA                      | ChIP-qPCR                                |
| miR-361-YY1-8 R    | TGTCCCATTTTGGGCATAGT                      | ChIP-qPCR                                |
| miR-361-YY1-9 F    | TGAACTTATTCAGTGATGACAGGA                  | ChIP-qPCR                                |
| miR-361-YY1-9 R    | GGTTATGACAAAATCACAGTAGCA                  | ChIP-qPCR                                |
| miR-361-YY1-10 F   | CATTGGTTTCCCTCCACAGT                      | ChIP-qPCR                                |
| miR-361-YY1-10 R   | TCGAGCTTCACACACACACA                      | ChIP-qPCR                                |
| YY1-let-7a-3 pro F | GATGATGAAGTAGTTGGACCTT                    | ChIP-qPCR positive control (reference 1) |
| YY1-let-7a-3 pro R | CTGCCATTGAAATCTTGC                        | ChIP-qPCR positive control               |
| GAPDH pro F        | AACTTTCCCGCCTCTCAGC                       | ChIP-qPCR negative control (reference 2) |
| GAPDH pro R        | CAGGAGGACTTTGGGAACGA                      | ChIP-qPCR negative control               |

**Supplementary Table 3: The association between miR-361 expression and clinicopathologic factors of human endometrial cancers**

| Factors               |        | miR-361 expression |      | P-value |
|-----------------------|--------|--------------------|------|---------|
|                       |        | Low                | High |         |
| Grade                 | I-II   | 2                  | 9    | 0.006   |
|                       | III    | 10                 | 3    |         |
| Tumor Diameter        | ≤ 3 cm | 4                  | 6    | 0.45    |
|                       | > 3 cm | 8                  | 6    |         |
| Myometrial invasion   | ≤ 50%  | 7                  | 10   | 0.22    |
|                       | > 50%  | 5                  | 2    |         |
| FIGO Stage            | Ia     | 7                  | 8    | 0.62    |
|                       | Ib     | 2                  | 3    |         |
|                       | II-III | 3                  | 1    |         |
| Lymph node metastasis | (-)    | 10                 | 12   | 0.48    |
|                       | (+)    | 2                  | 0    |         |
| Ovarian metastasis    | (-)    | 12                 | 10   | 0.24    |
|                       | (+)    | 0                  | 2    |         |

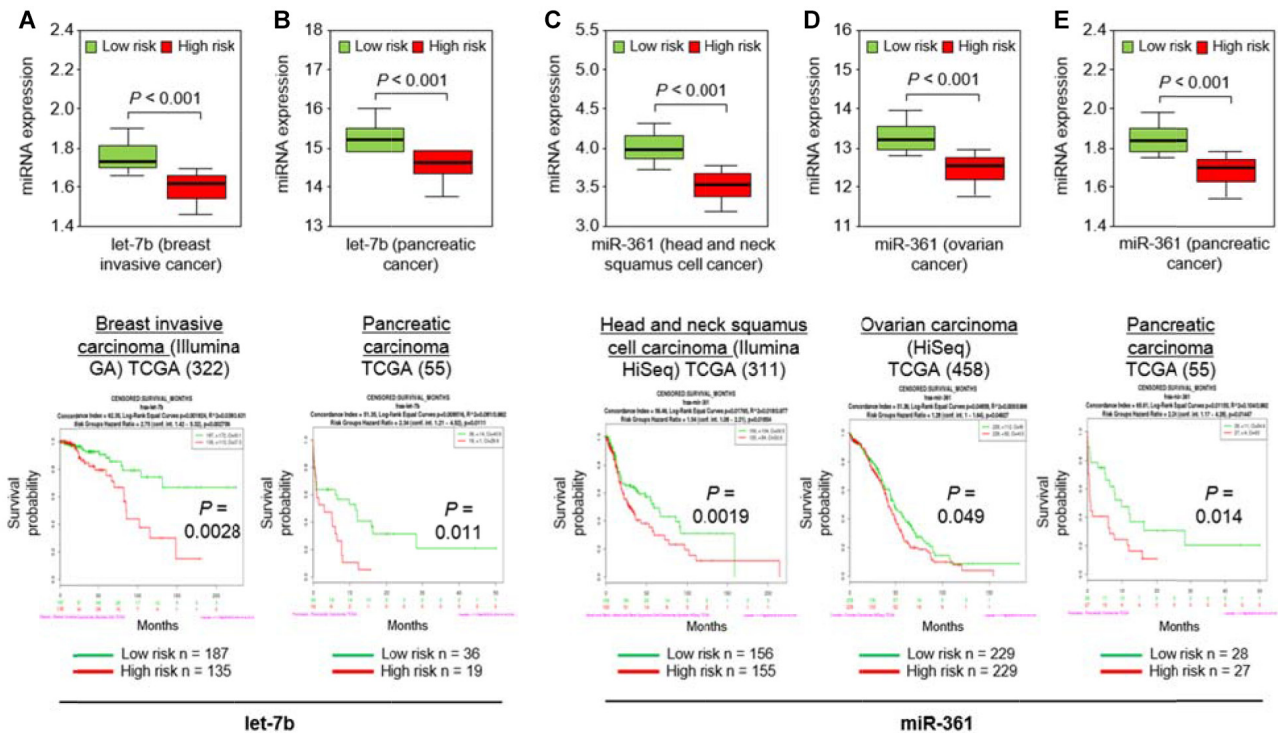

**Supplementary Figure 1: Decreased let-7b and miR-361 levels are correlated with poor prognosis in several human tumors.** Upper panel: The expression data of let-7b (A and B) or miR-361 (C–E) was extracted from the TCGA datasets comprising multiple cancer types and analyzed in SurvMicro database. Box plots demonstrating significantly lower levels of let-7b (a and b) or miR-361 (C–E) in high-risk patients. Lower panel: Kaplan-Meier plots of patients in multiple TCGA tumor datasets, which compare the overall survival between tumors with high-risk (red) or low-risk (green) of poor survival according to let-7b or miR-361-based prognostic scores were created using the SurvMicro database.

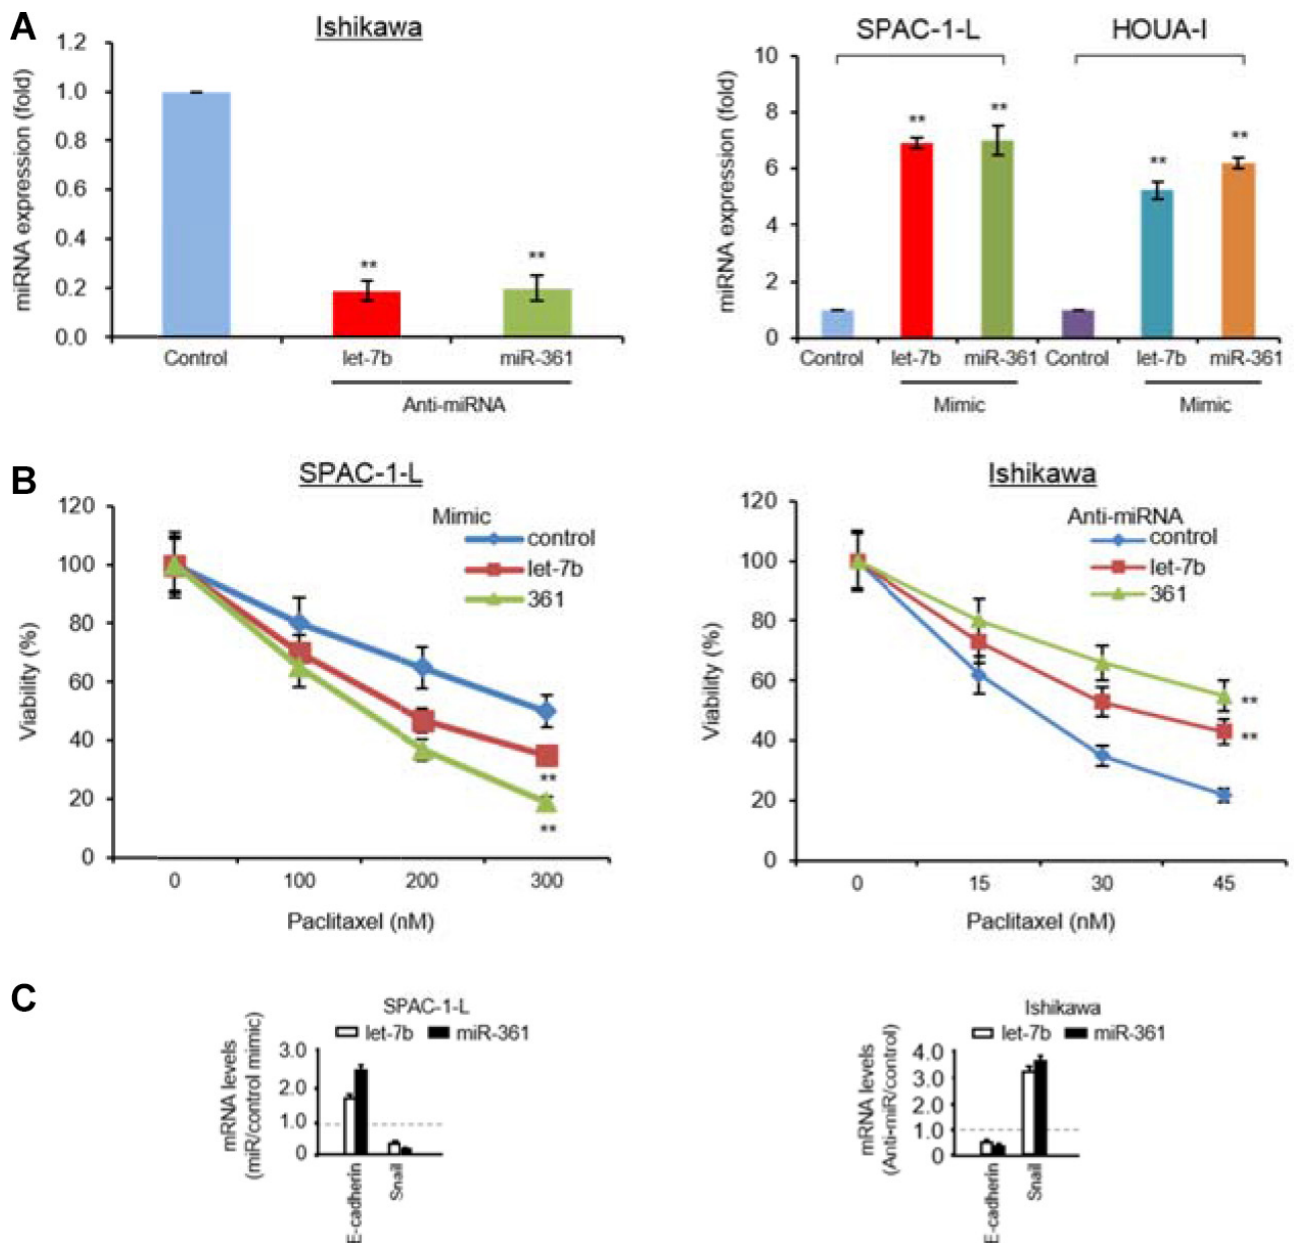

**Supplementary Figure 2: Overexpression of miR-361 sensitizes EC cells to paclitaxel treatment.** (A) qRT-PCR analysis of let-7b and miR-361 in Ishikawa cells transfected with anti-let-7b, anti-miR-361 or miRNA inhibitor negative control (left). let-7b and miR-361 levels were measured by qRT-PCRs in SPAC-1-L or HOUA-I cells after overexpression of let-7b or miR-361, respectively (right). (B) SPAC-1-L (left) and Ishikawa cells (right) were transfected with let-7b mimic, miR-361 mimic, anti-let-7b inhibitor, anti-miR-361 inhibitor or corresponding negative controls, followed by treatment with DMSO or with Paclitaxel for 24 hours. Cell viability was measured using cell counting kit-8 assay. The values were expressed as the percentage of viable cells, with the viability of DMSO-treated cells set at 100%. (C) qRT-PCR analysis of E-cadherin and Snail expression in SPAC-1-L cells transfected with let-7b mimic, miR-361 mimic or miRNA mimic negative control (left), and in Ishikawa cells transfected with anti-let-7b, anti-miR-361 or miRNA inhibitor negative control (right). \*\* $P < 0.01$ .

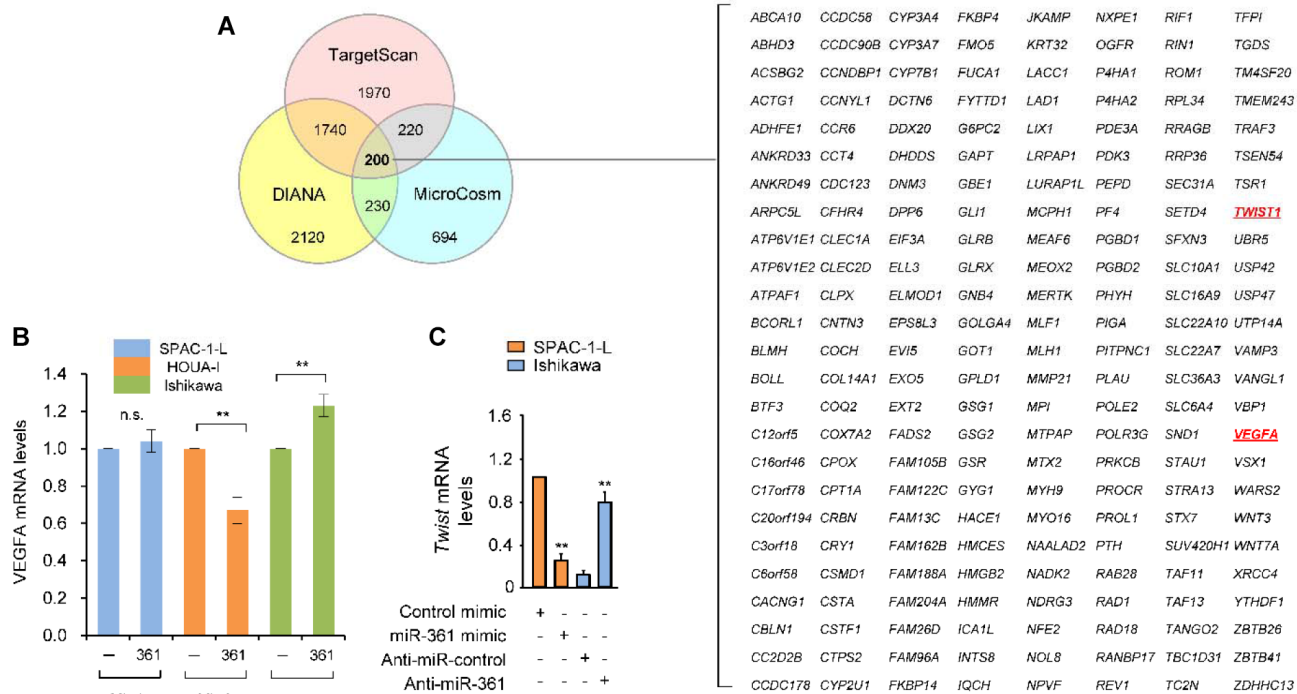

**Supplementary Figure 3: Identification of genes that are candidate targets of miR-361 in EC cells.** (A) Prediction algorithms (TargetScan, DIANA and MicroCosm) suggest that Twist1 and VEGFA, together with other 188 genes, might be regulated by miR-361 by direct targeting. (B) qRT-PCR analysis of VEGFA mRNA expression in three endometrial cancer cell lines transfected with miR-361 mimic, anti-miR-361 inhibitor or their negative controls as indicated. (C) Relative Twist mRNA expression in SPAC-1-L after overexpression of miR-361, or in Ishikawa cells upon knockdown of miR-361, using qRT-PCRs. n.s., not significant. \*\* $P < 0.01$ .

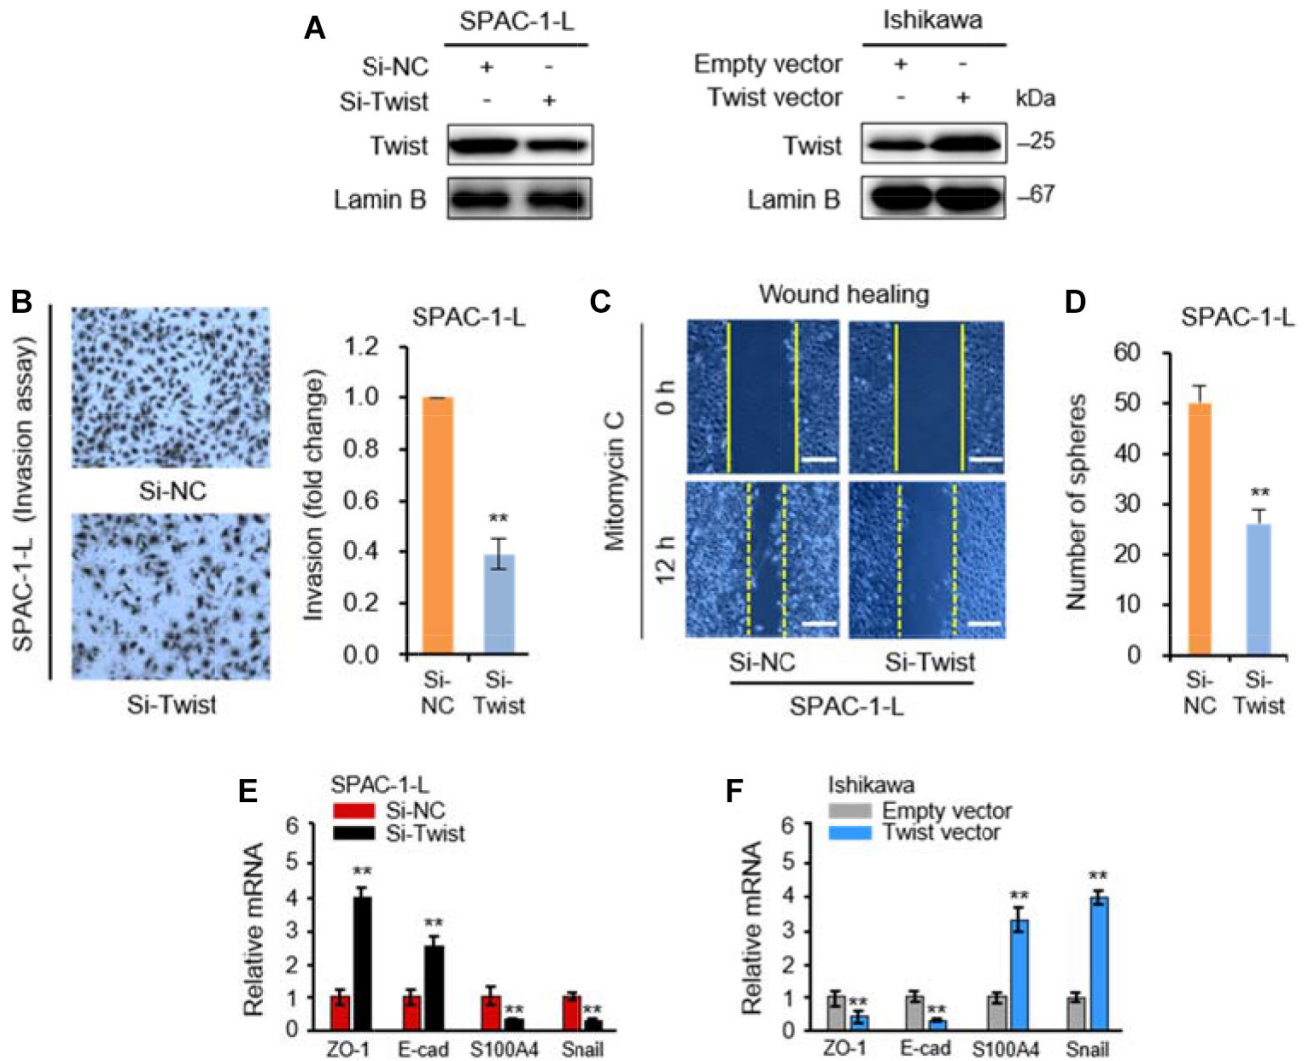

**Supplementary Figure 4: Impact of Twist1 expression on EC cell invasion, migration and sphere formation.** (A) Knockdown of Twist in SPAC-1-L cells (upper), or overexpression of Twist in Ishikawa (lower) cells and Twist protein expression was assessed using western blot analysis. (B) Cell invasion assay in SPAC-1-L cells treated with either Twist1 siRNA (Si-Twist) or negative control siRNA (Si-NC). Data are presented as fold change over Si-NC cells. (C) The scratch wound healing assay in SPAC-1-L cells transfected with either Si-Twist or Si-NC in the presence of Mitomycin C. Solid lines: the initial wound boundaries; dashed lines: the boundaries of migrated cells. (D) Sphere formation assay after transfection of SPAC-1-L cells with Si-NC or Si-Twist. SPAC-1-L (E) and Ishikawa (F) cells were transfected as indicated, and the mRNA levels of *ZO-1*, *E-cadherin*, *S100A4* and *Snail* in these cells were measured using qRT-PCRs. \*\* $P < 0.01$ .

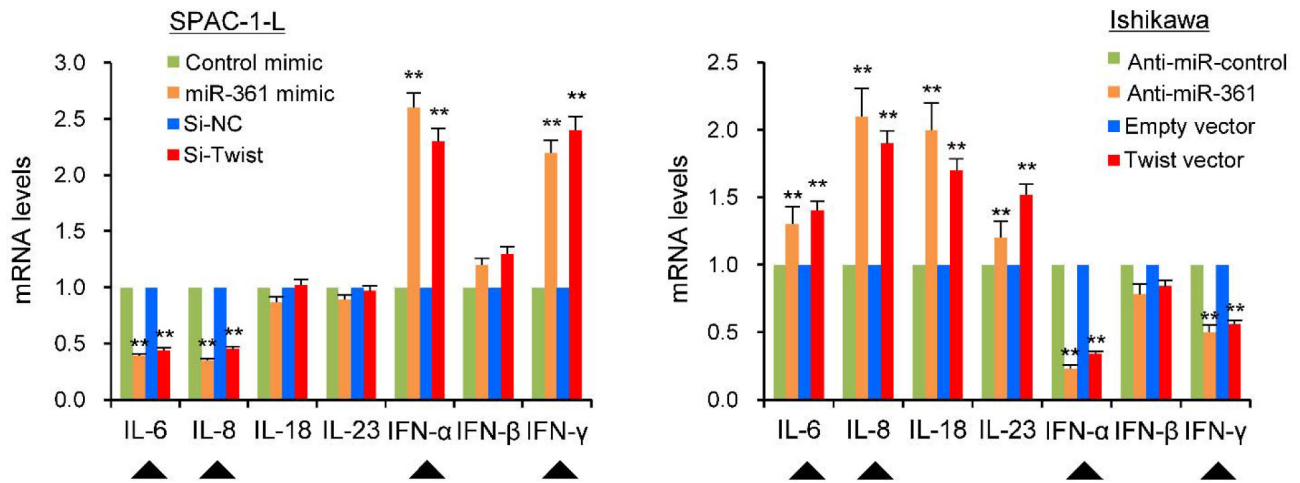

**Supplementary Figure 5: Identification of Twist-regulated inflammatory genes in EC cells.** SPAC-1-L (left) and Ishikawa (right) cells were transfected as indicated, and IL-6/8/18/23, IFN- $\alpha/\beta/\gamma$  mRNA levels in these cells were measured using qRT-PCR. Arrow heads mark those genes that are consistently regulated by miR-361 or Twist in both cell lines.  $**P < 0.01$ .

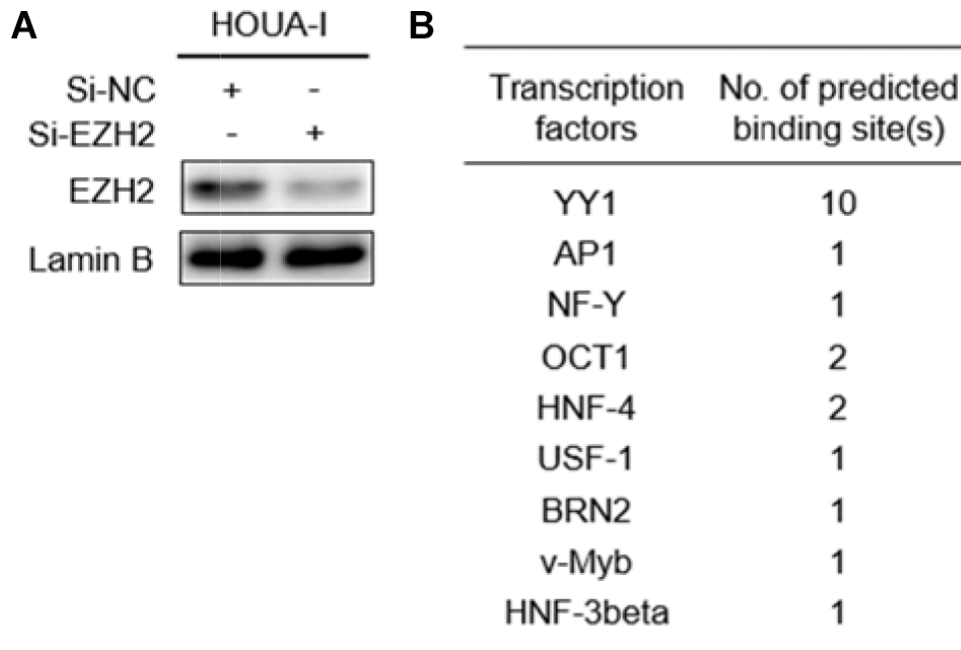

**Supplementary Figure 6: (A)** Knockdown of EZH2 protein expression in HOUA-I cells, as assessed using western blot analysis. **(B)** TRANSFAC analysis identified numerous sites for various DNA-binding transcription factors upstream of pre-miR-361.



**A**

Ishikawa

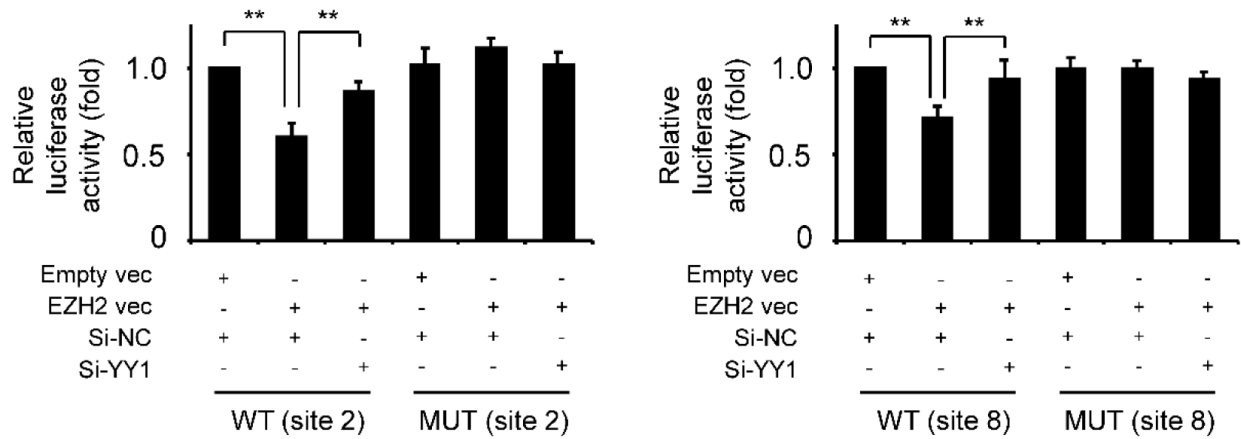

**B**

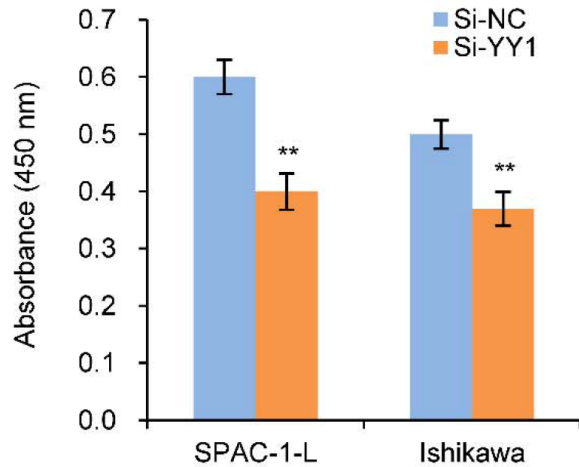

**C**

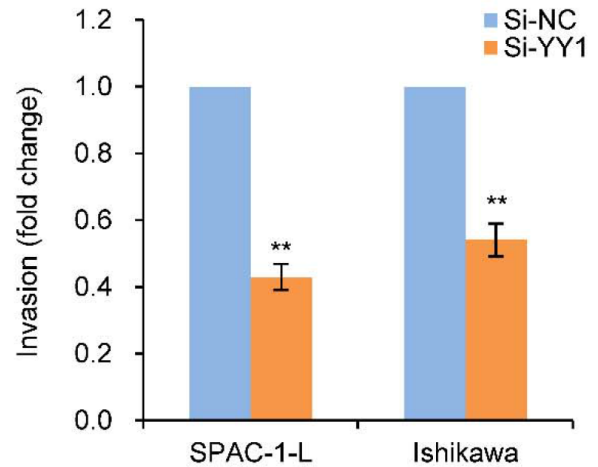

**Supplementary Figure 7: Knockdown of YY1 abolished the miR-361 transcriptional repression induced by EZH2 and decreases cell proliferation and invasion of EC cells.** Knockdown of YY1 abolished the miR-361 transcriptional repression (site 2 and 8) induced by EZH2 in Ishikawa cells (A), and decreases cell proliferation (B) and invasion (C) of SPAC-1-L and Ishikawa cells, as measured by reporter assays, cell counting kit-8 assay and invasion assay (data are presented as fold change over Si-NC cells), respectively. \*\* $P < 0.01$ .

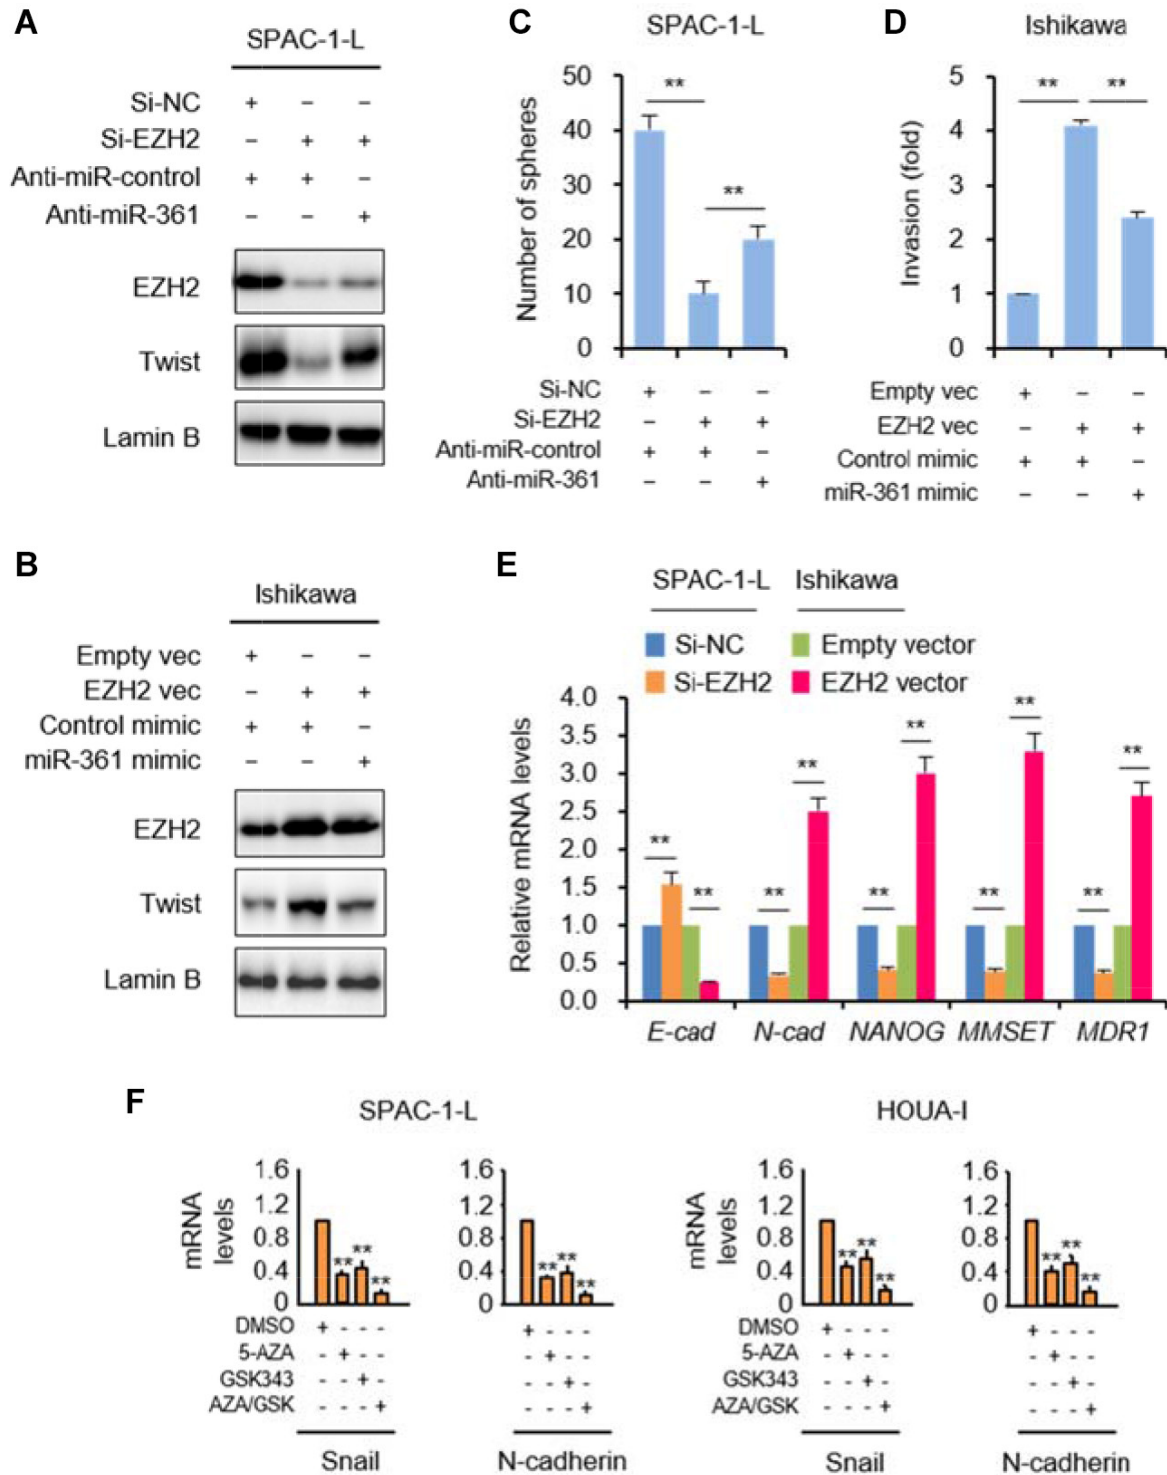

**Supplementary Figure 8: EZH2-induced invasion and stemness requires miR-361 inhibition.** EZH2, Twist, E-cadherin and Vimentin protein levels in SPAC-1-L cells transfected with Si-EZH2, together with or without anti-miR-361 inhibitor (A), or in Ishikawa cells transduced with EZH2 vector, together with or without miR-361 mimic (B). (C) Sphere formation assay of SPAC-1-L cells transfected with Si-EZH2, with or without anti-miR-361 inhibitor. (D) Invasion assay of Ishikawa cells transduced with EZH2 vector, with or without miR-361 mimic. (E) *E-cadherin*, *N-cadherin*, *NANOG*, *MMSET* and *MDR1* mRNA levels in SPAC-1-L cells transfected with Si-NC or Si-EZH2, or in Ishikawa cells transfected with empty vector or EZH2 vector. (F) Snail and N-cadherin mRNA levels in SPAC-1-L and HOUA-I cells treated with GSK343 and 5-AZA alone or in combination. \*\* $P < 0.01$ .

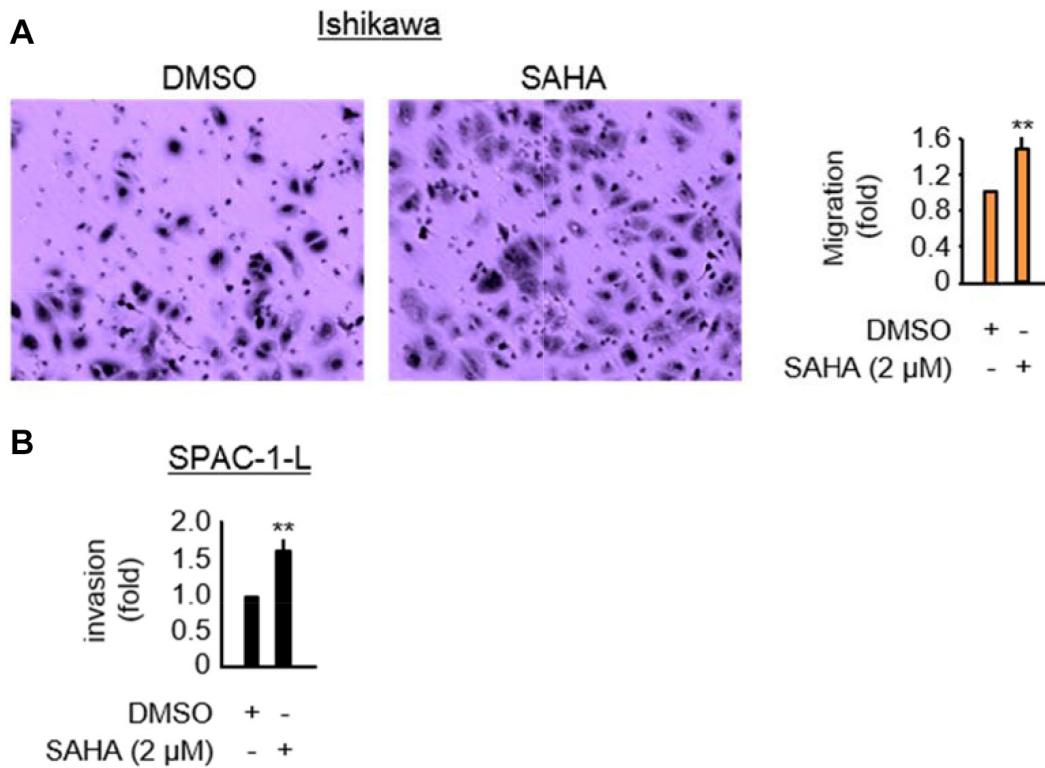

**Supplementary Figure 9: The treatment with SAHA increased EC cell migration and invasion.** (A) Transwell cell migration assay showing enhanced migration of Ishikawa cells treated with SAHA (2  $\mu$ M) for 72 hours. (B) Cell invasion assays demonstrating that SAHA treatment (2  $\mu$ M, 72 hours) promotes invasive potential of SPAC-1-L cells. Migration and invasion data are presented as fold change over DMSO-treated cells. \*\* $P < 0.01$ .

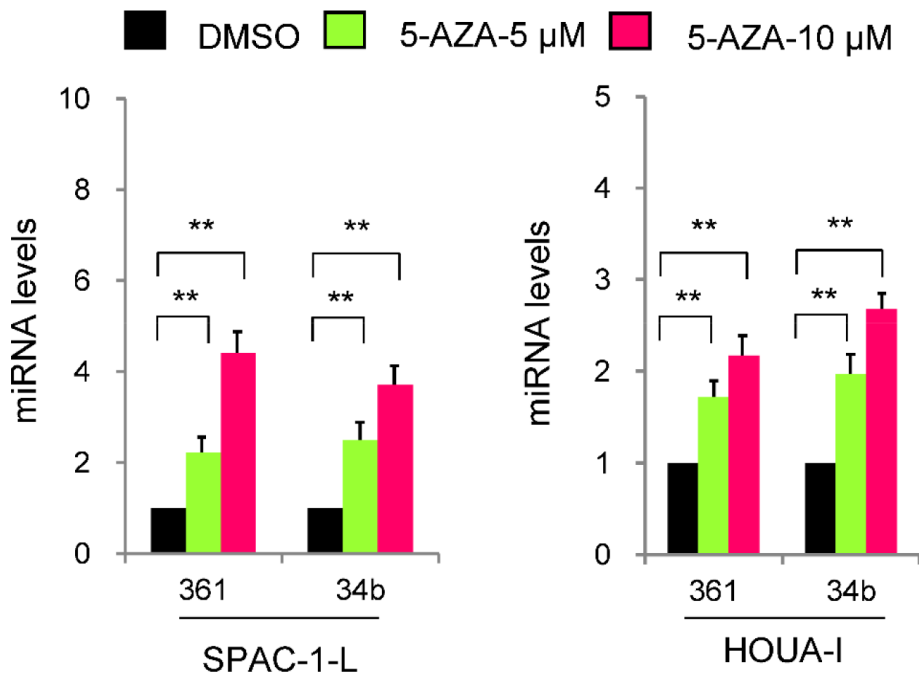

**Supplementary Figure 10: 5-AZA induced miR-361 and miR-34b levels in EC cells.** Expression of miR-361 and miR-34b in SPAC-1-L and HOUA-I cells after 5-AZA treatment (5 and 10  $\mu$ M, 72 hours), as measured by qPCR. \*\* $P < 0.01$ .
